# Supplementary material for: Mouse liver injury induces hepatic macrophage FGF23 production
Source: PubMed Central journal article supplement (PMC8887750; doi:10.1371/journal.pone.0264743), 2022-03-01
Supplement: pone.0264743.s001.pdf [file pone.0264743.s001.pdf]

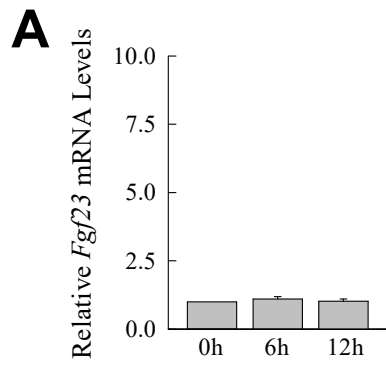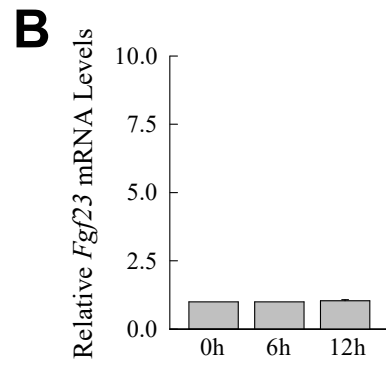

Fig S1
