# Supplementary material for: Mouse liver injury induces hepatic macrophage FGF23 production
Source: PubMed Central journal article supplement (PMC8887750; doi:10.1371/journal.pone.0264743), 2022-03-01

Fig. 1B original full size western film images for FGF23 (top panel) and tubulin (bottom panel). Numbers represent molecular weight marker sizes in KD.

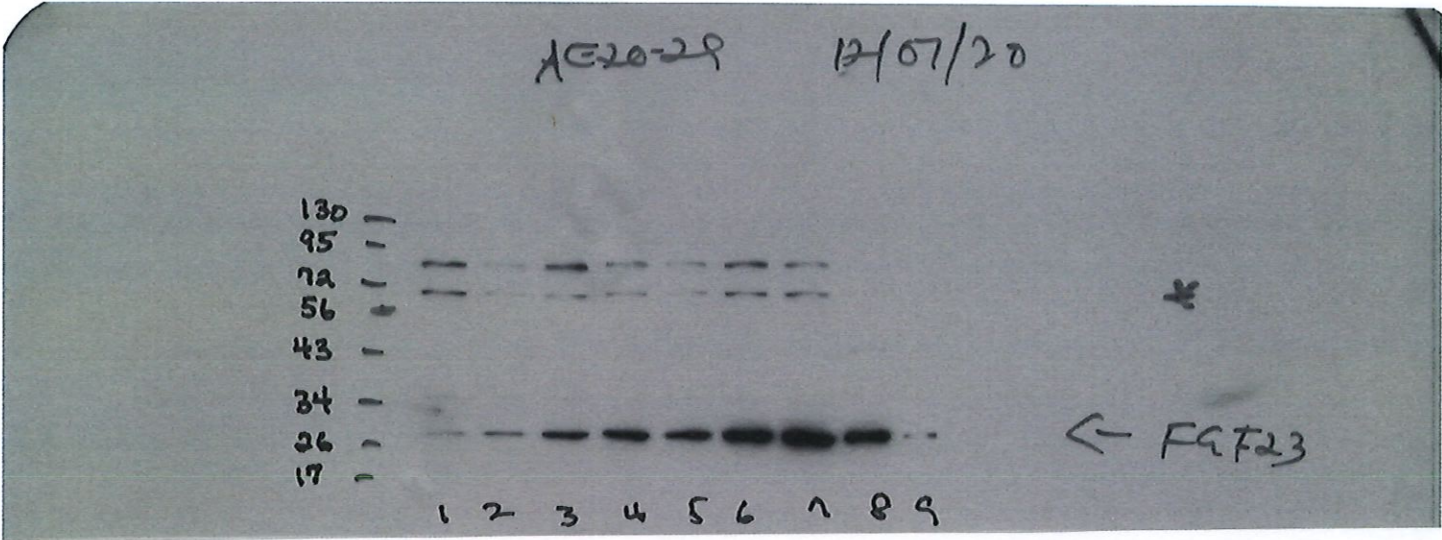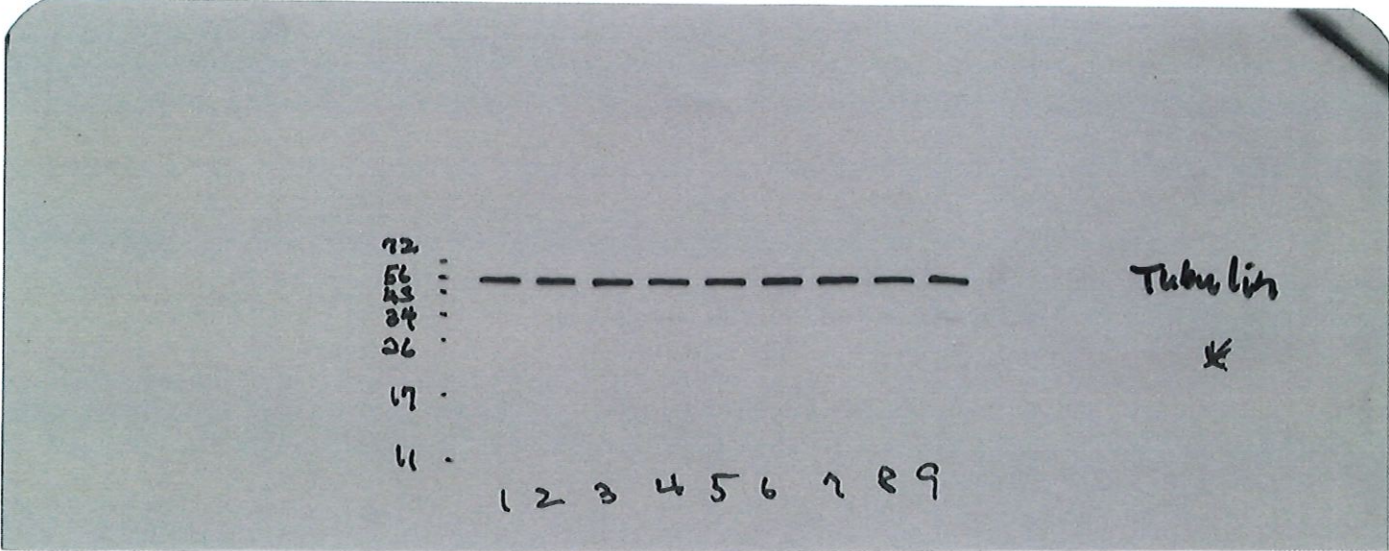

Fig. 2B original full size western film images for FGF23 (top panel) and tubulin (bottom panel). Numbers represent molecular weight marker sizes in KD.

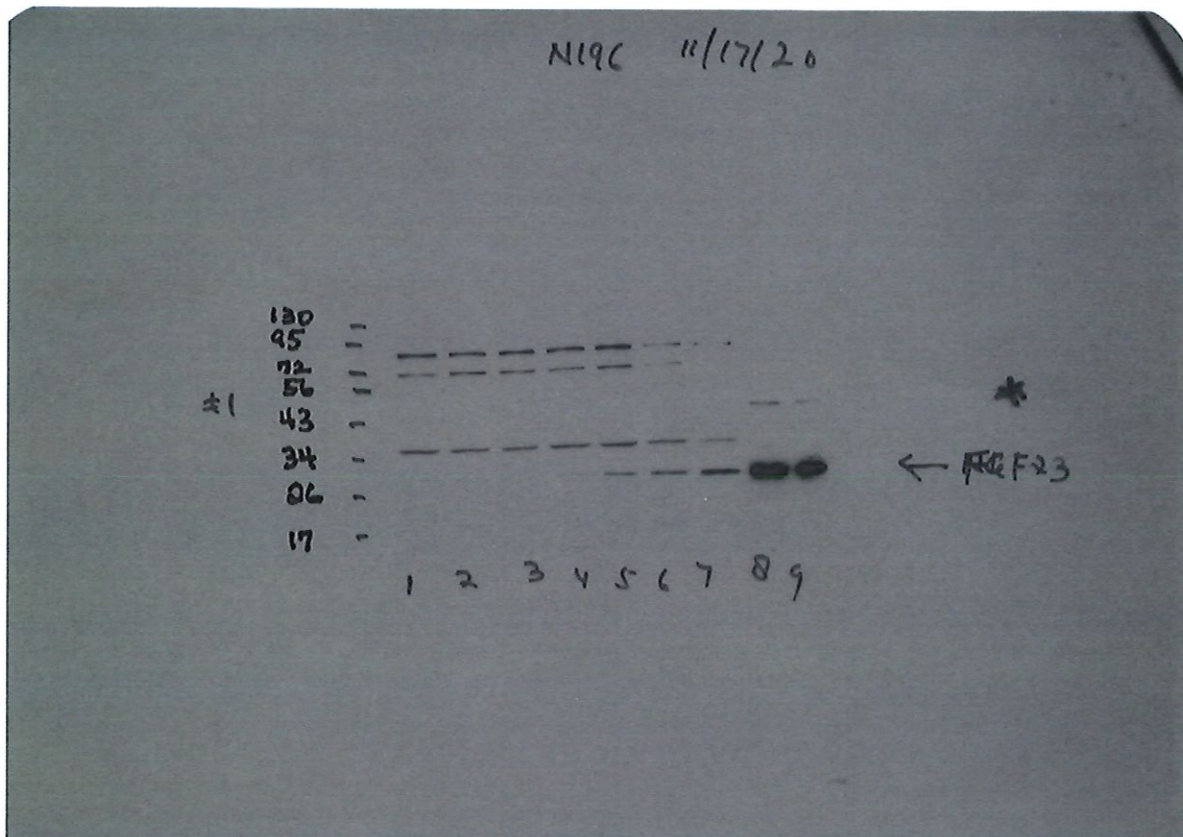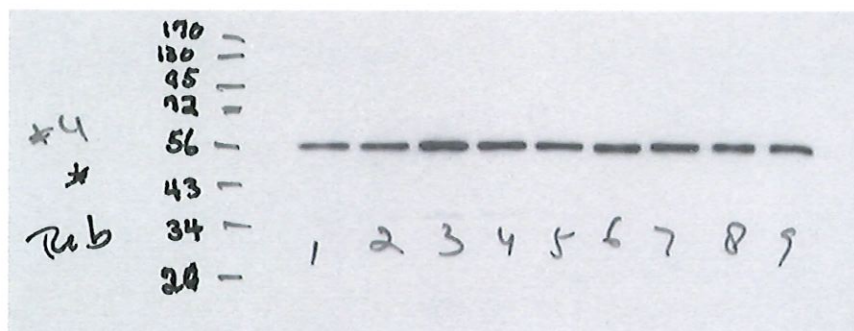

Supplement: pone.0264743.s002.pdf [file pone.0264743.s002.pdf]
